# Supplementary material for: Agrobacterium-derived cytokinin influences plastid morphology and starch accumulation in Nicotiana benthamiana during transient assays
Source: PubMed Central journal article supplement (PMC4062310; doi:10.1186/1471-2229-14-127), 2014-05-09
Supplement: 1471-2229-14-127-S1.pdf [file 1471-2229-14-127-S1.pdf]

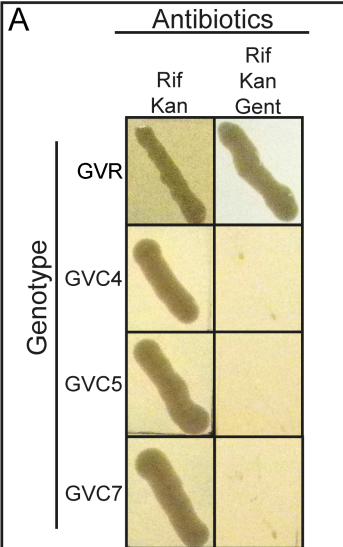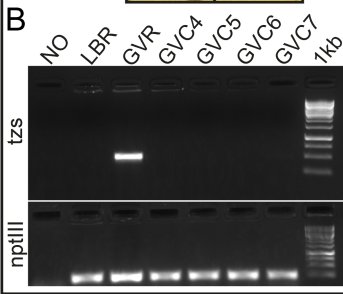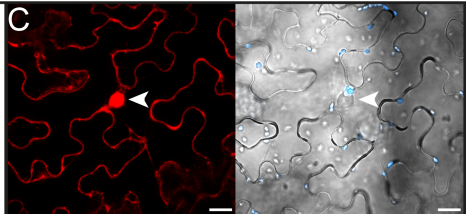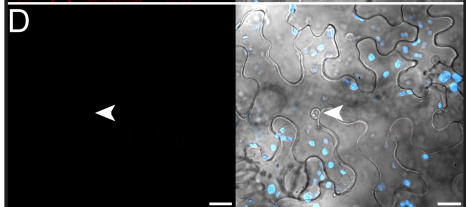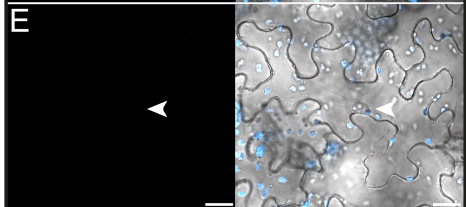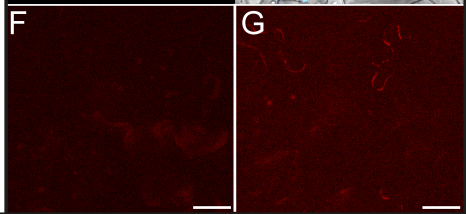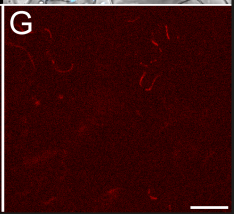

1 **Supplemental Figure 1. Evidence of successful curing of GVR of**  
2 **(pMP90)**

3

4 **A** *A. tumefaciens* plated on YEB with antibiotics (Rif=rifampicin,  
5 Kan=kanamycin, Gent=gentamycin) to show the loss of gentamycin  
6 resistance in putative cured strains GVC4, 5 and 7. GVR was plated as a  
7 control.

8

9 **B** The top panel is a colony PCR confirming the loss of the *tzs* gene from 4 *A.*  
10 *tumefaciens* strains (GVC4-7) following curing. Negative controls included a  
11 no DNA control (NO) and LBR, while GVR served as the positive control. As a  
12 PCR control the same set of colonies was used in a second PCR reaction  
13 (lower panel) where primers specific to the *nptIII* gene present in the pCP60-  
14 35S-dsRed2 were used (this vector should be present in all strains used and  
15 so should produce a product in all cases except the no DNA control).

16

17 **C-E** Confocal images of *N. benthamiana* lower epidermis. Left panel is the  
18 DsRed channel, and right panel is the multi-channel image (bright field and  
19 chlorophyll, which is falsely colored blue) of the same cell. The position of the  
20 nuclei is indicated by white arrows.

21

22 **C** GVR-infiltrated positive control accumulating DsRed2 in the nucleus  
23 (indicated by a white arrow) and the cytoplasm (outlines cells in red).

24

25 **D** Non-infiltrated negative control showing no expression of DsRed2.

26

27 **E** GVC4-infiltrated tissue showing no expression of DsRed2.

28

29 **F** Non-infiltrated tissue, DsRed2 channel under high gain.

30

31 **G** GVC4-infiltrated tissue, DsRed channel under high gain.
